# Supplementary material
Source: PubMed Central journal article supplement (PMC6697803)
Supplement: pnas.1900079116.sapp.pdf [file pnas.1900079116.sapp.pdf]

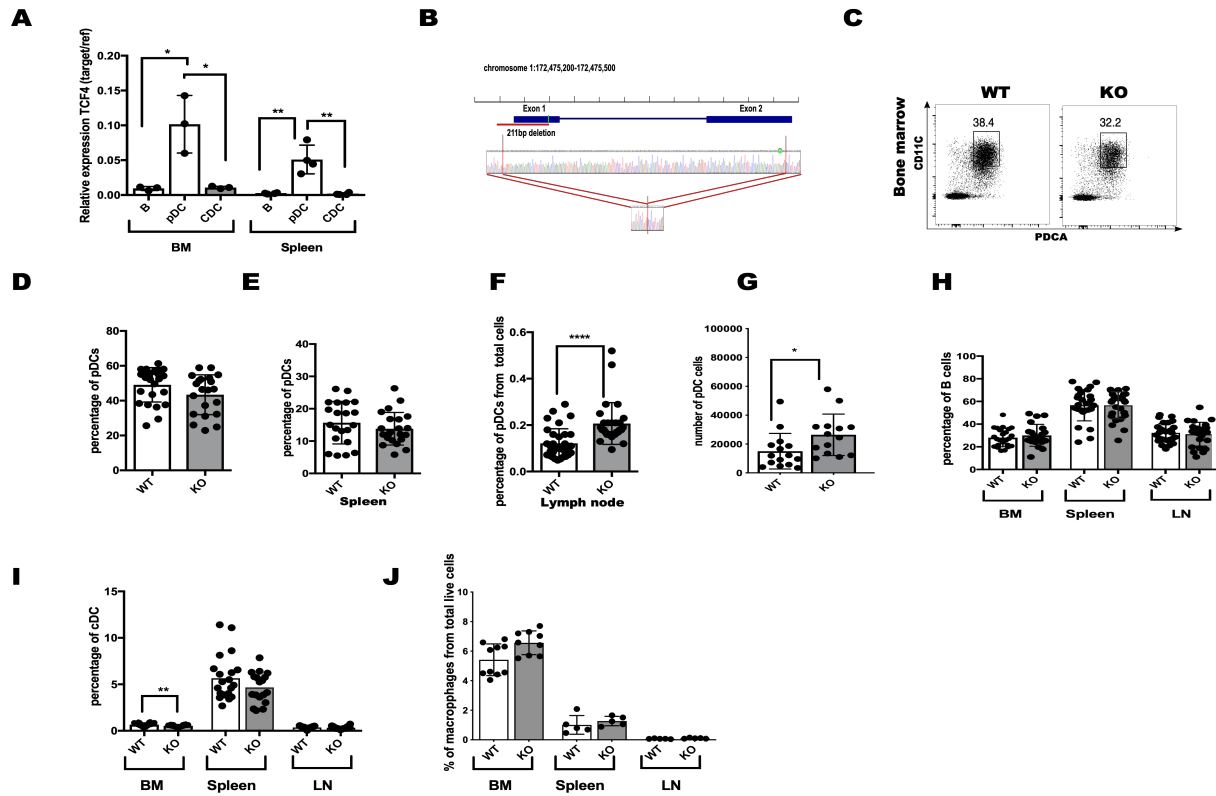

**Fig S1- phenotypic characterization of splenic and BM pDCs in *SLAMF9*<sup>-/-</sup> mice and illustration of deleted sequence in *SLAMF9*<sup>-/-</sup> mice.**

**(A)** Sorted pDCs (CD19-CD11C<sup>inter</sup>B220+PDCA<sup>+</sup>), B cells (CD19<sup>+</sup> B220<sup>+</sup>) and cDCs (CD19-B220-CD11B+CD11C<sup>high</sup>) were analyzed for the mRNA levels of TCF-4 by qRT-PCR. Graphs show relative expression of target gene/reference gene (L32); n=3 mice. **(B)** Schematic illustration of 211 bp deletion on chromosome one within the genomic region of the *SLAMF9* gene. The blue bars indicate exon1 and exon2. Green vertical line within exon1 indicates the location of the initiator methionine. The deleted sequence is indicated between the inner red diagonal line. **(C-D)** Analysis of BM pDCs (CD19-CD11C<sup>inter</sup>B220+PDCA<sup>+</sup>) in WT and *SLAMF9*<sup>-/-</sup> mice shown in a representative dot plot and a graphical view. **(E)** Graph shows the percent of pDCs in the spleen. Results are a summary of 6 independent experiments. n= 22 mice. **(F-G)** Analysis of lymph node WT and *SLAMF9*<sup>-/-</sup> pDCs. Graph shows the percent of LN pDCs from total live cells (F) and absolute numbers of pDCs in the iLNs (G). Results are a summary of at least three independent experiments. n= 12-22 mice. **(H-J)** Analysis of LN B cells (CD19<sup>+</sup> B220<sup>+</sup>) (H) and LN cDCs (CD19-B220-CD11B+CD11C<sup>high</sup>) (I) and macrophages (CD19-B220-CD11C-CD11B+Ly6G- F480+) (J) in WT or *SLAMF9*<sup>-/-</sup> mice.

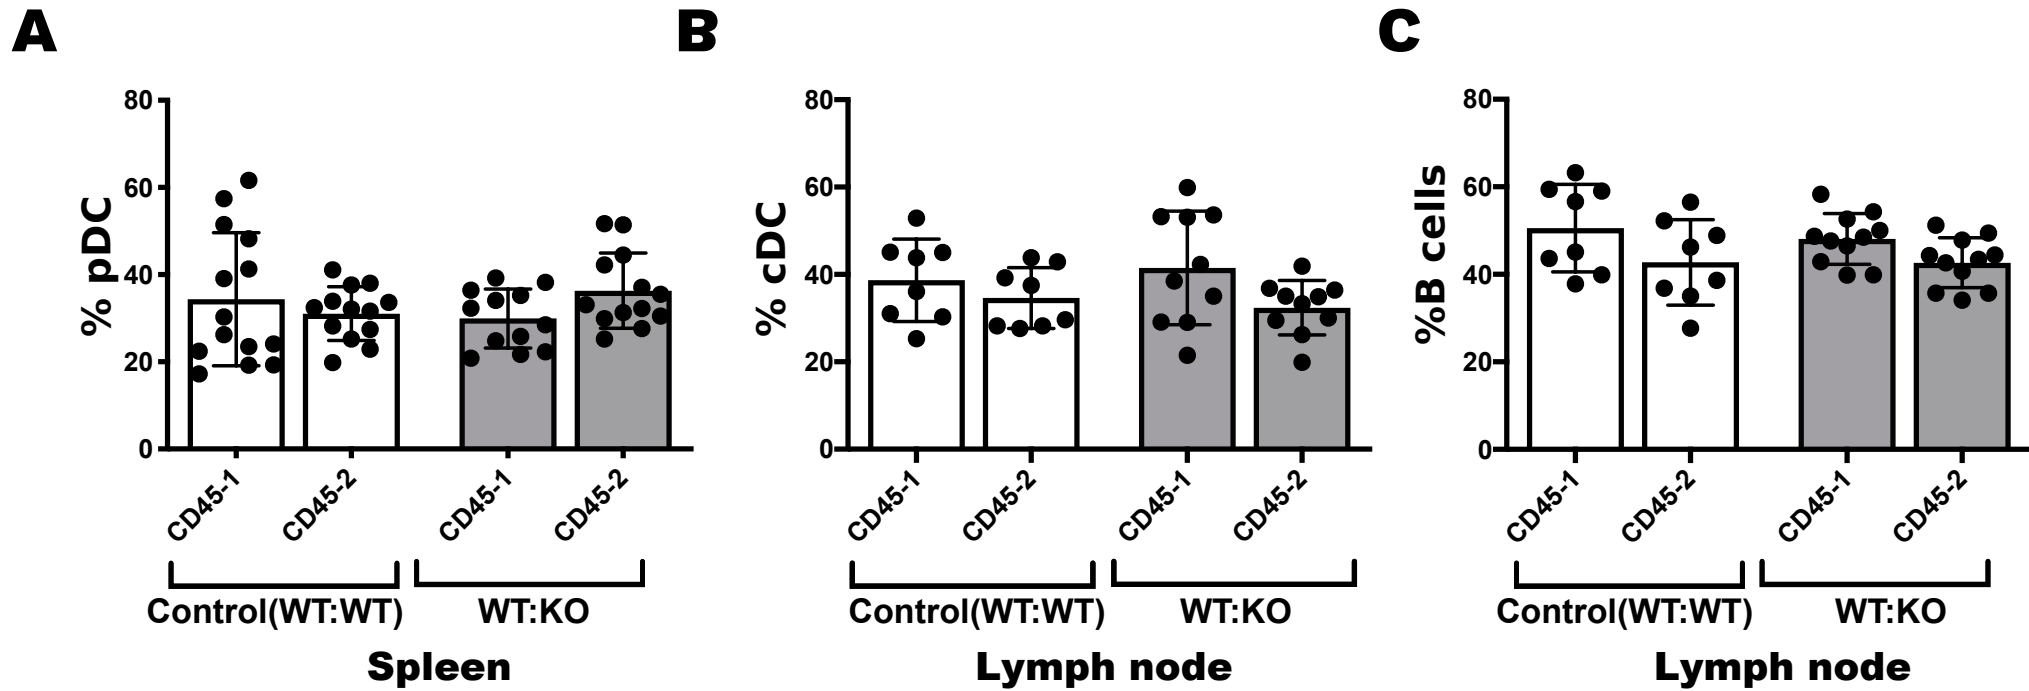

**Fig S2 -B cell and CDC frequencies in chimeric mice**

Lethally irradiated CD45.1 mice were transplanted with a total of  $2 \times 10^6$  BM cells from CD45.1 (WT) and CD45.2 (WT) mice, or from CD45.1 (WT) and CD45.2 (KO: SLAMF9<sup>-/-</sup>) mice at a 1:1 ratio. Mice were harvested 8 weeks post-transplant and splenic pDCs and cDC and B cell populations in the lymph node were analyzed. **(A)** Graph shows the percentage of pDCs in the spleen derived from CD45.1 and CD45.2 lineages in chimeric mice. **(B-C)** Graph shows the percentage of cDCs (B), or B cells (C) derived from CD45.1 and CD45.2 lineages in chimeric mice. Results are representative of experiments from three independent chimera. n=11-13 mice.

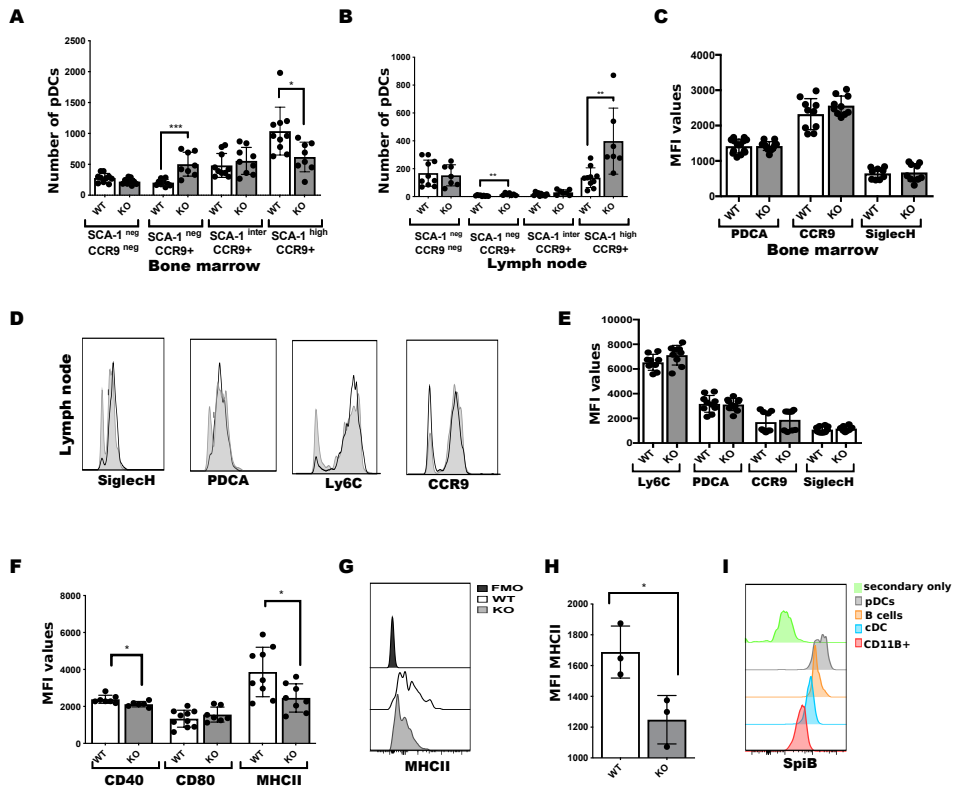

**Fig S3- SLAMF9<sup>-/-</sup> LN pDCs have similar activation markers**

**(A-B)** pDCs were harvested from the BM and LN of WT and SLAMF9<sup>-/-</sup> mice (KO). Graph shows the absolute numbers of pDCs subsets per 300,000 cells in the BM (A) and in the iLNs (B). **(C)** Graph shows the MFI values of pDC markers in the BM. **(D-F)** pDCs were harvested from the LN of WT and SLAMF9<sup>-/-</sup> mice (KO). Representative histograms of staining and MFI values for pDC markers in LN of WT and SLAMF9<sup>-/-</sup> pDCs (D-E) and MFI values of co-stimulatory markers in LN pDCs (CD19<sup>-</sup> CD11C<sup>inter</sup> B220<sup>+</sup> PDCA<sup>+</sup>) (F). Results are a summary of three independent experiments. n=8-11 mice. **(G-H)** Analysis of MHC class II expression in pDCs from the LN (CD19<sup>-</sup> CD11C<sup>inter</sup> B220<sup>+</sup> CCR9<sup>+</sup> SCA-1<sup>+</sup> CD11B<sup>-</sup>). Representative histogram of staining for MHC class II in WT and SLAMF9<sup>-/-</sup> pDCs compared with fluorescence minus one (FMO) control (G) and MFI values of MHC class II of WT and SLAMF9<sup>-/-</sup> pDCs (H). **(I)** Analysis of SPIB expression in immune cell population in the LN. Representative histogram of staining in B cells, cDC cells, pDCs and CD11B cells compared with negative control (only secondary).

**A**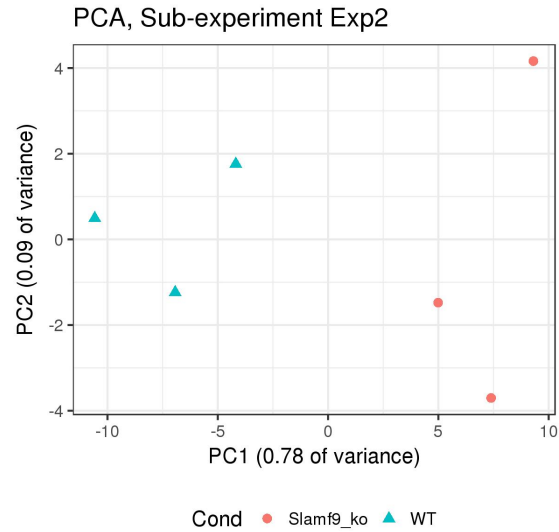**B**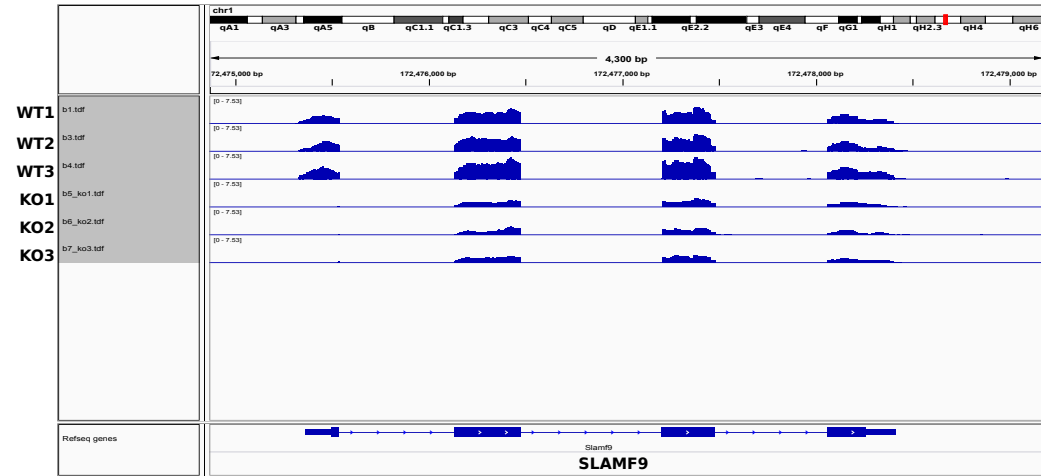

### Fig S4-RNA-seq PCA analysis and IGV plots

BM pDCs (CD19-CD11B-CD11C<sup>inter</sup> B220+PDCA+) were sorted from WT and SLAMF9<sup>-/-</sup> mice (KO). RNA was extracted and subjected to sequencing. Differentially expressed genes were identified by p value < 0.05 and fold change greater or equal to 1.5. **(A)** Principal component analysis (PCA) demonstrating distinct clusters for pDC samples obtained from WT and SLAMF9<sup>-/-</sup> mice. **(B)** IGV image demonstrating deleted exon1 region in knockout samples after normalization of the coverage to the library size.

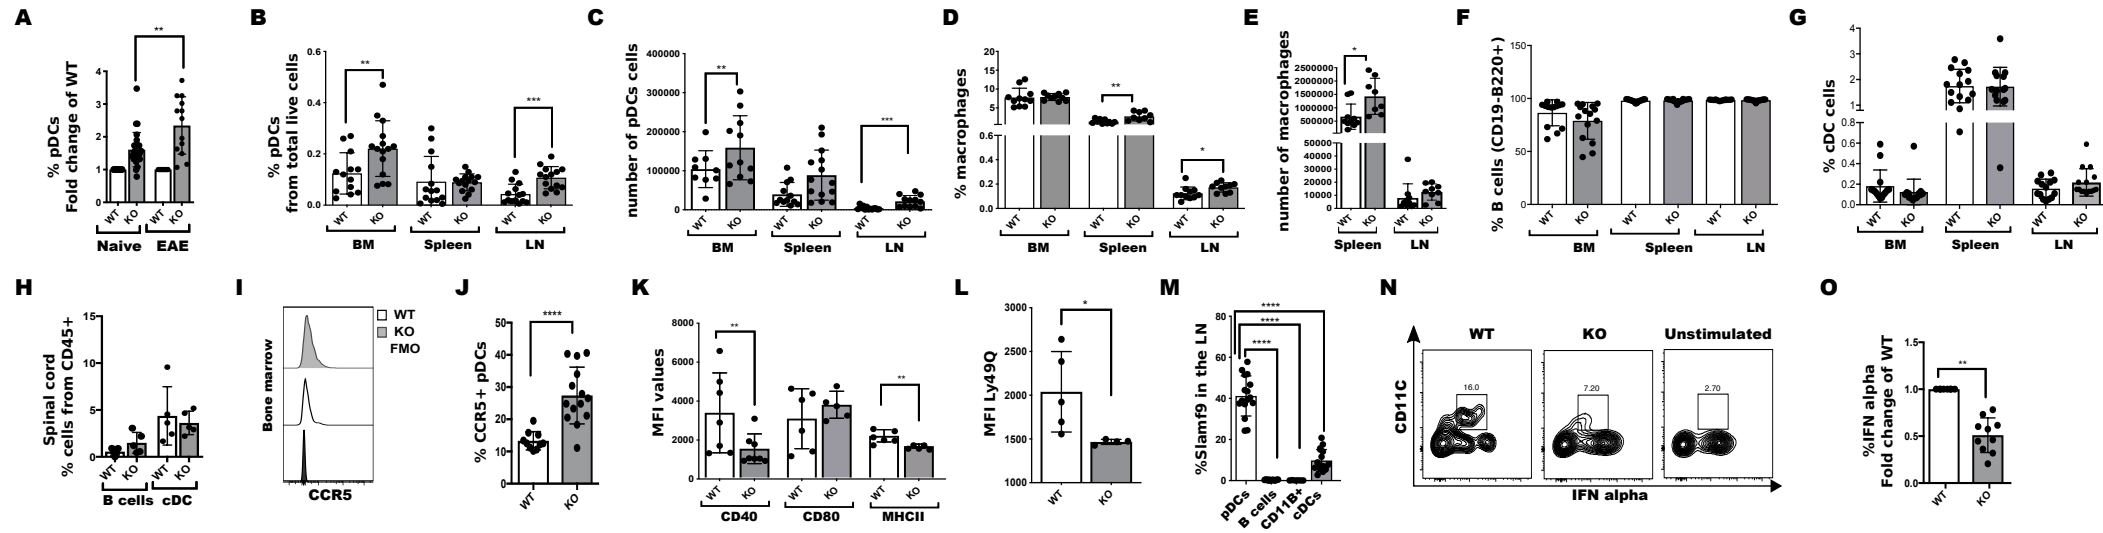

### Fig S5-Analysis of cells following 14 days of EAE induction

EAE was induced in C57BL/6 WT and SLAMF9 <sup>-/-</sup> mice by subcutaneous injection of MOG33-55 peptide in complete Freund's adjuvant and further intraperitoneal injection of Pertussis toxin on days 0 and 2. **(A)** Graph shows the increase in SLAMF9 <sup>-/-</sup> pDCs (KO) compared to WT cells in healthy animals, and during EAE. **(B-C)** Analysis of pDCs in SLAMF9 <sup>-/-</sup> compared with WT mice in EAE. Graph shows the percent of pDCs (CD19- CD11C<sup>inter</sup> B220+PDCA+ CD11B-) from total live cells (B) and absolute numbers in the iLNs (C). **(D-E)** Analysis of macrophages in SLAMF9 <sup>-/-</sup> compared with WT mice. Graph shows the absolute numbers of macrophages in the spleen and lymph nodes (D) and the percent of macrophages (CD19-B220-CD11C-CD11B+Ly6G-F480) from total live cells (E) **(F-G)** Graph shows the percentages B cells (CD45+B220+CD11B-) and the percent of cDC (CD19-B220-CD11B+CD11C<sup>high</sup>) (G). **(H)** Graph shows the percentages of cDC (CD45+CD11C<sup>high</sup> CD11B+) and B cells (CD45+B220+CD11B-) in the spinal cord, 16 days after EAE induction. Results are representative of two independent experiments; each dot represents two mice.

**(I-J)** Analysis of CCR5 levels in BM pDCs following 14 days of EAE induction. Representative histograms of CCR5 on WT and SLAMF9(-/-) pDCs compared with fluorescence minus one (FMO) control(I) Graph shows the percent of CCR5+ pDCs in the BM (J). Results are representative of two independent experiments; n=10-14 mice; p\*\*\*\*<0.0001. **(K-L)** Analysis of MFI values in WT and SLAMF9<sup>-/-</sup> pDCs in the LN. Graph shows MFI values of co-stimulatory markers in LN pDCs (K) and MFI values for Ly49Q (L). **(M)** SLAMF9 protein levels were analyzed in following 14 days post EAE induction in the LN. Graph shows protein expression in pDCs (CD19-CD11C<sup>inter</sup> B220+PDCA+ CD11B-), B cells (CD19+ B220+), cDCs (CD19-B220-CD11B+CD11C<sup>high</sup>) and in macrophages (CD11B+CD11C<sup>neg</sup> CD19-SSC<sup>low</sup>). **(N-O)** pDCs were freshly isolated at day 16 following EAE induction and stimulated for 18h with 1 μM of ODN1585. (N) Representative plot of IFNα levels on WT and SLAMF9(-/-) pDCs compared with unstimulated control. (O) Graph shows the fold of change in IFNα percent from WT following TLR9 stimulation. Results are representative of two independent experiments n=8-10 ;p\*\*\*\*<0.0001.
